# Supplementary material for: A systematic review and meta-analysis of risk factors for long COVID
Source: Research Square preprint supplement (doi:10.21203/rs.3.rs-7667974/v1), 2025-10-23

**Supplementary Figure 1. Funnel plots for each long COVID risk factor**


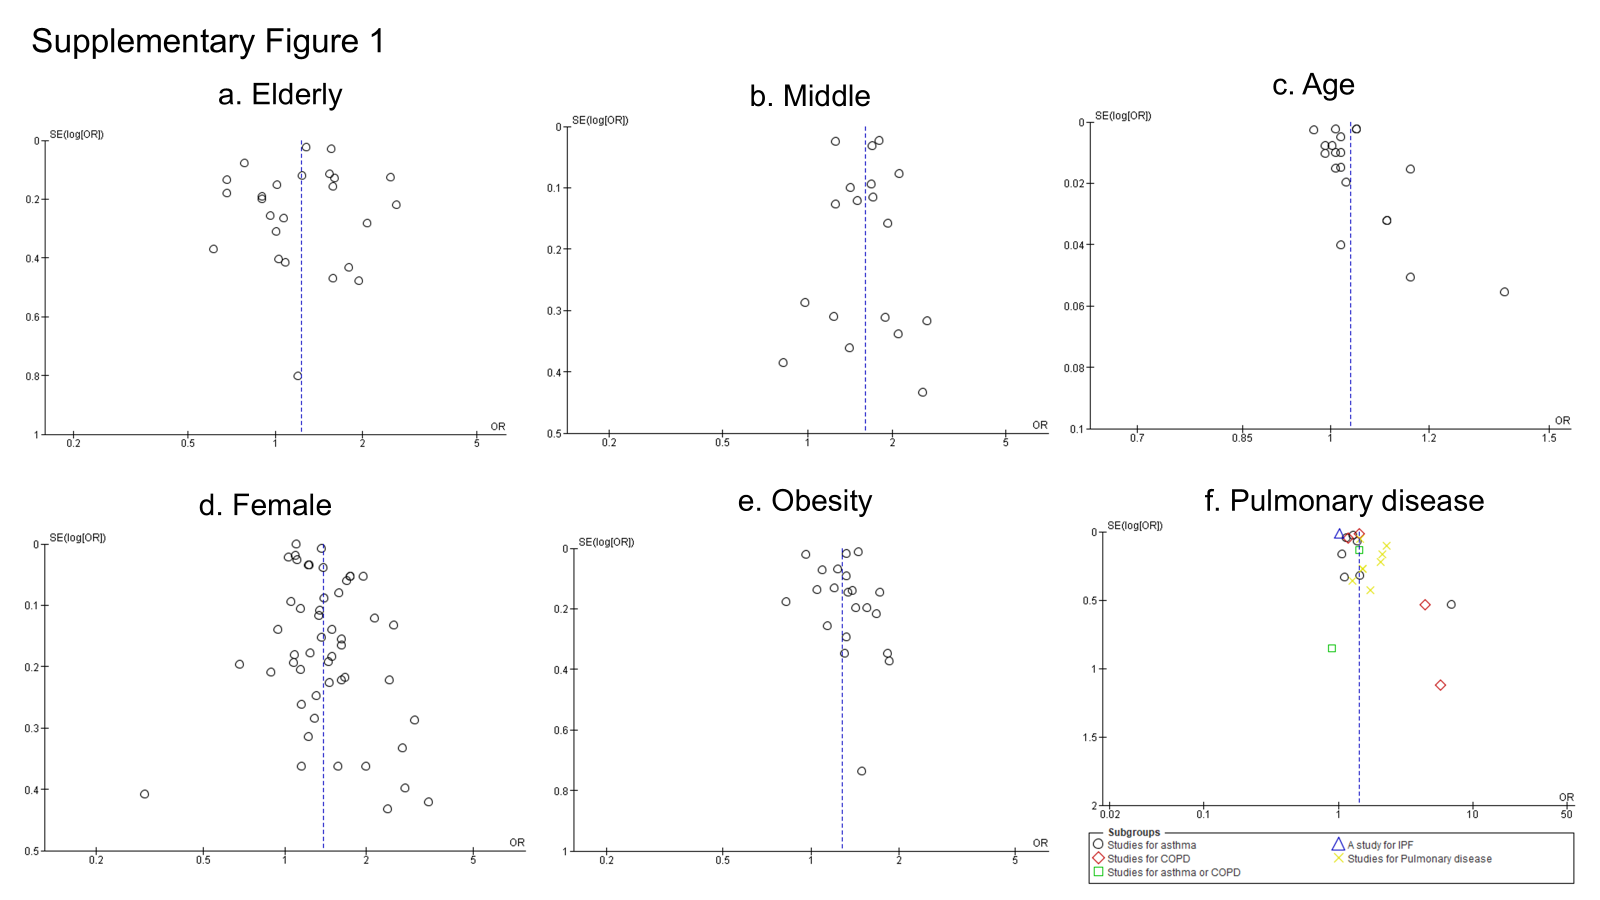


**
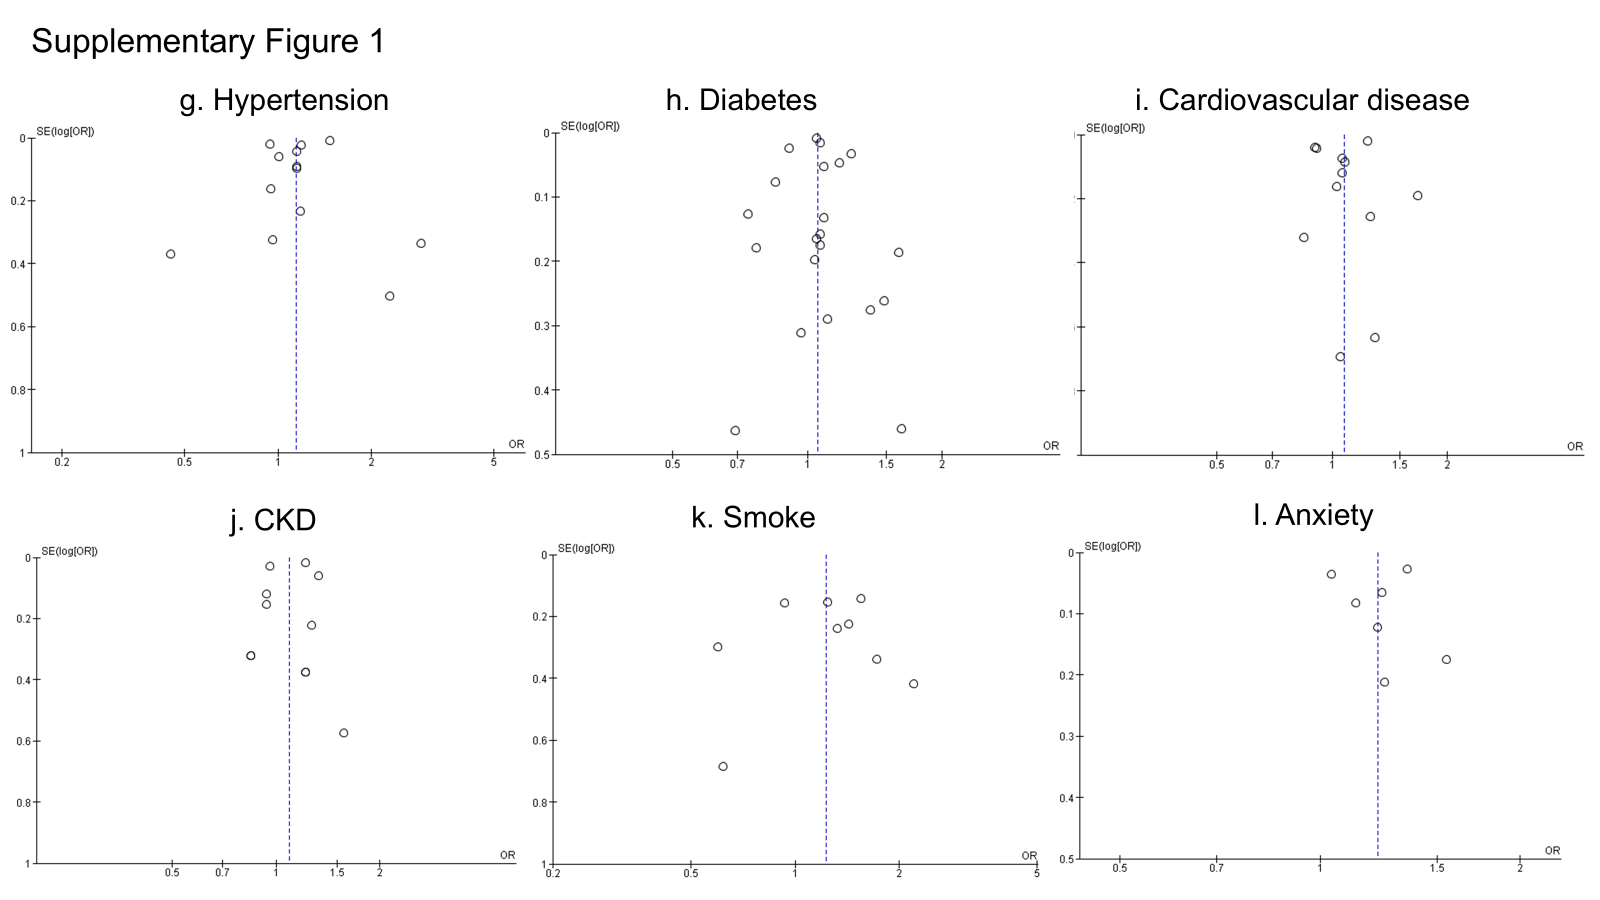
**

**
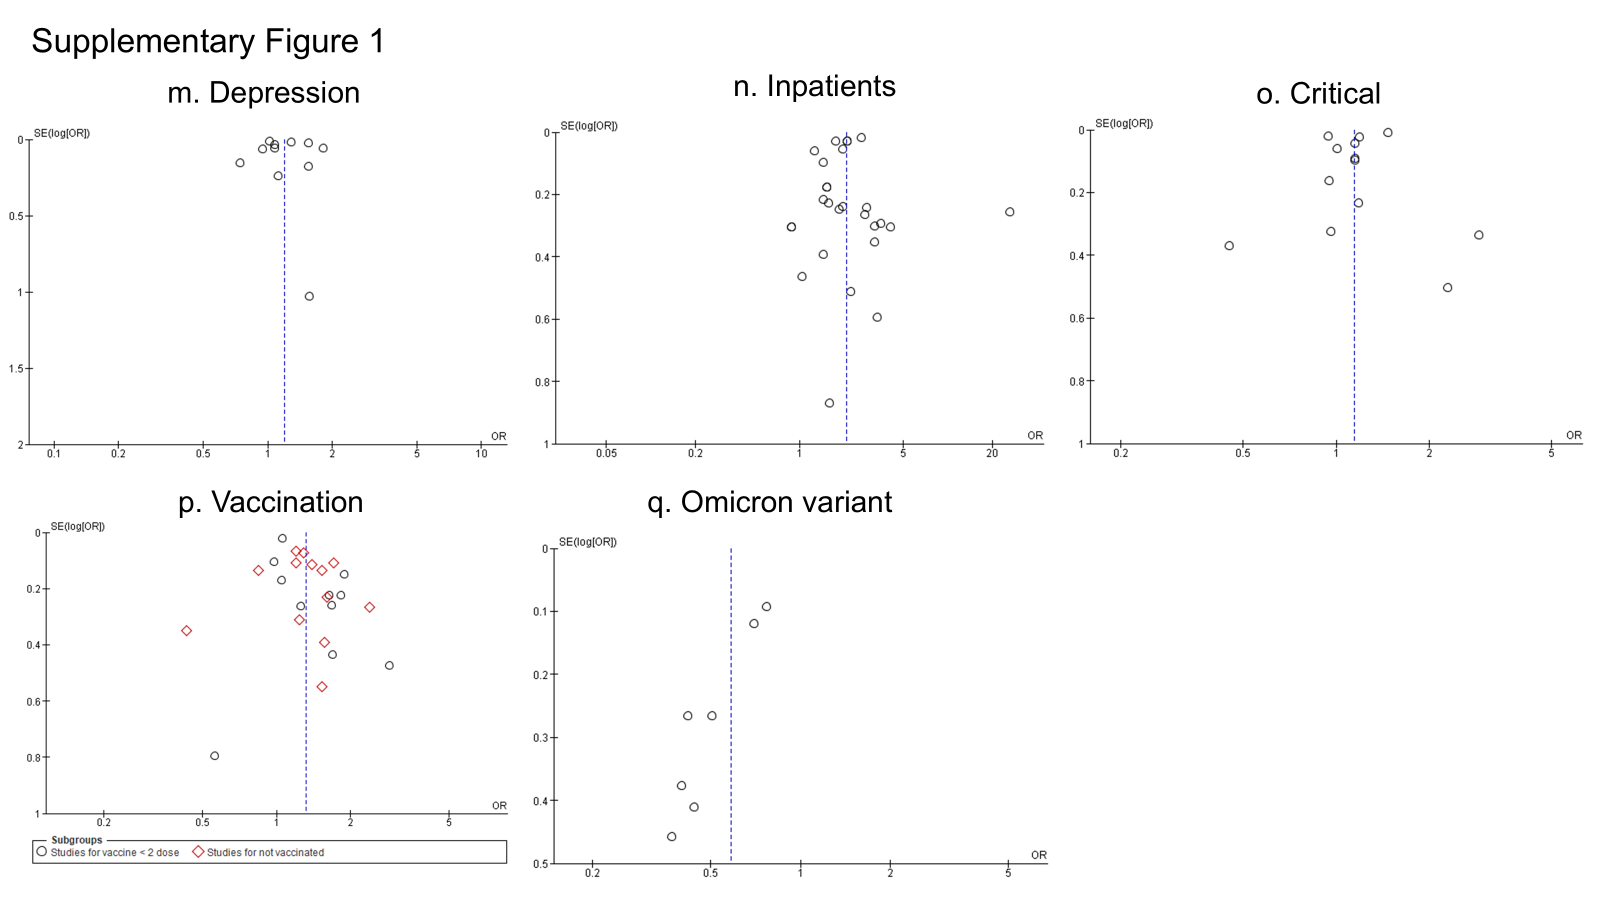
**

**Supplementary Figure 1. Funnel plots for each long COVID risk factor**

a) Funnel plots of studies evaluating the elderly as a risk factor for long COVID

b) Funnel plots of studies evaluating the middle-age as a risk factor for long COVID

c) Funnel plots of studies evaluating the age as a risk factor for long COVID

d) Funnel plots of studies evaluating the female as a risk factor for long COVID

e) Funnel plots of studies evaluating the obesity as a risk factor for long COVID

f) Funnel plots of studies evaluating the pulmonary disease as a risk factor for long COVID

g) Funnel plots of studies evaluating the hypertension as a risk factor for long COVID

h) Funnel plots of studies evaluating the diabetes as a risk factor for long COVID

i) Funnel plots of studies evaluating the cardiovascular disease as a risk factor for long COVID

j) Funnel plots of studies evaluating the CKD as a risk factor for long COVID

k) Funnel plots of studies evaluating the smoke as a risk factor for long COVID

l) Funnel plots of studies evaluating the anxiety as a risk factor for long COVID

m) Funnel plots of studies evaluating the depression as a risk factor for long COVID

n) Funnel plots of studies evaluating the inpatients as a risk factor for long COVID

o) Funnel plots of studies evaluating the critical as a risk factor for long COVID

p) Funnel plots of studies evaluating the vaccination as a risk factor for long COVID

q) Funnel plots of studies evaluating the omicron variant as a risk factor for long COVID

**Supplementary Figure 2. Forrest plot showing risk of long COVID by age**


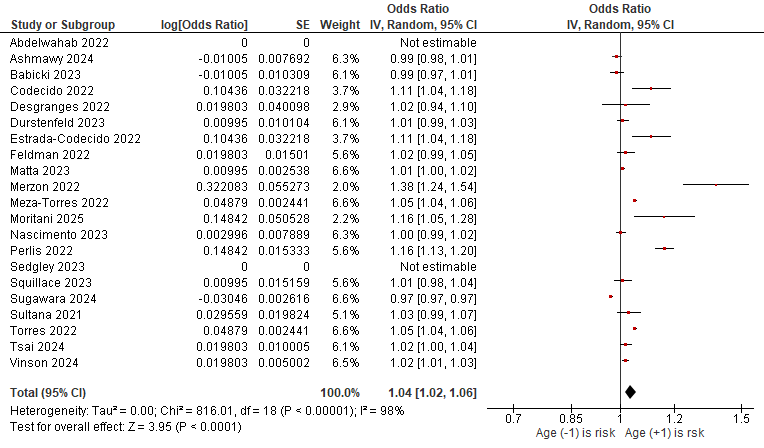


**Supplementary Figure 3. Forrest plot showing risk of long COVID for comorbidity**


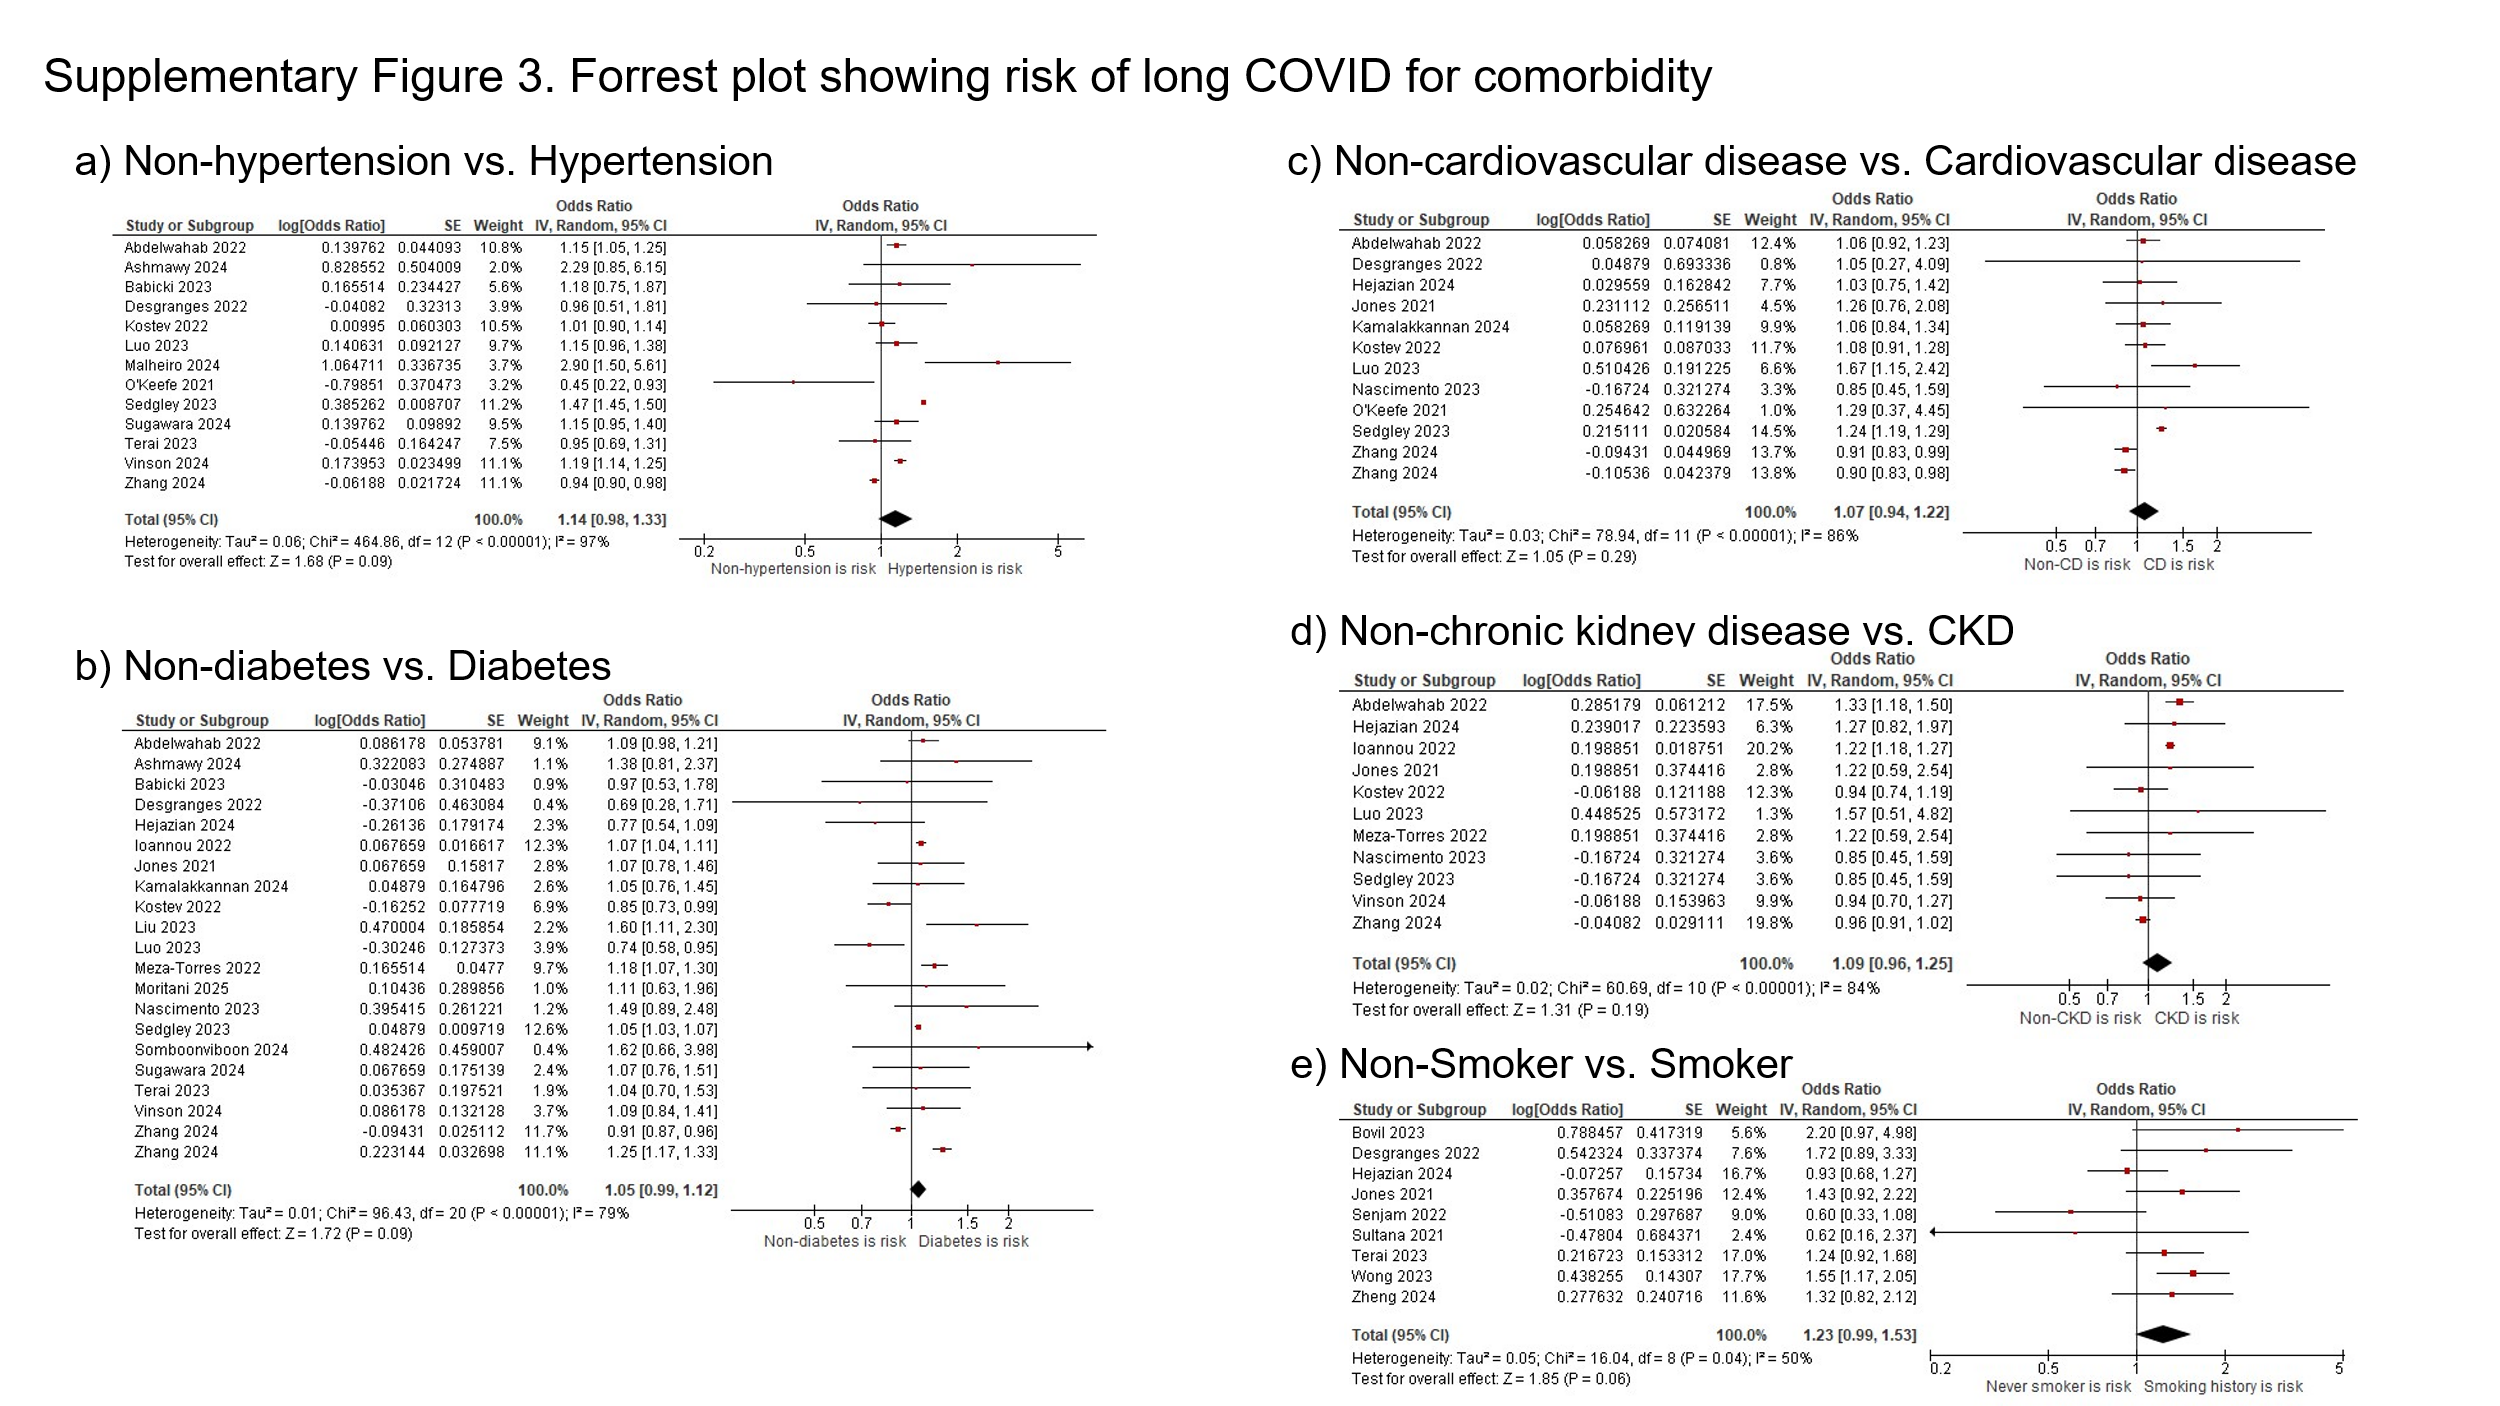


**Supplementary Figure 3. Forrest plot showing risk of long COVID for comorbidity**

a) Non-hypertension vs. Hypertension

b) Non-diabetes vs. Diabetes

c) Non-cardiovascular disease vs. Cardiovascular disease

d) Non-CKD vs. CKD

e) Non-Smoker vs. Smoker

**Supplementary Figure 4. Forrest plot showing risk of long COVID with omicron variant**


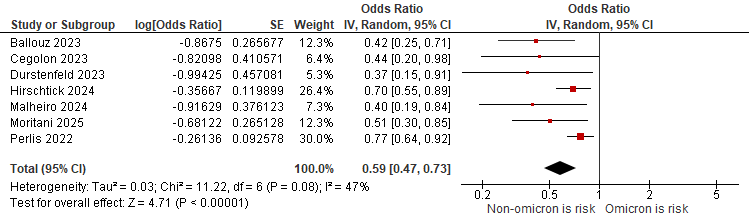

Supplement: Supplementary file 1 [file d36bf0d721855adbc0bf8e37.docx]
